# Supplementary material
Source: publisher figshare collection journal article supplement (https://gsajournals.figshare.com/ndownloader/files/14929769)

Hypothalamus  
KEGG Pathway Enrichment: Genes that are induced by reproductive experience (higher in primiparous)  
Spliceosome  
Enrichment FDR: 1.3E-02  
Genes in list are highlighted in red

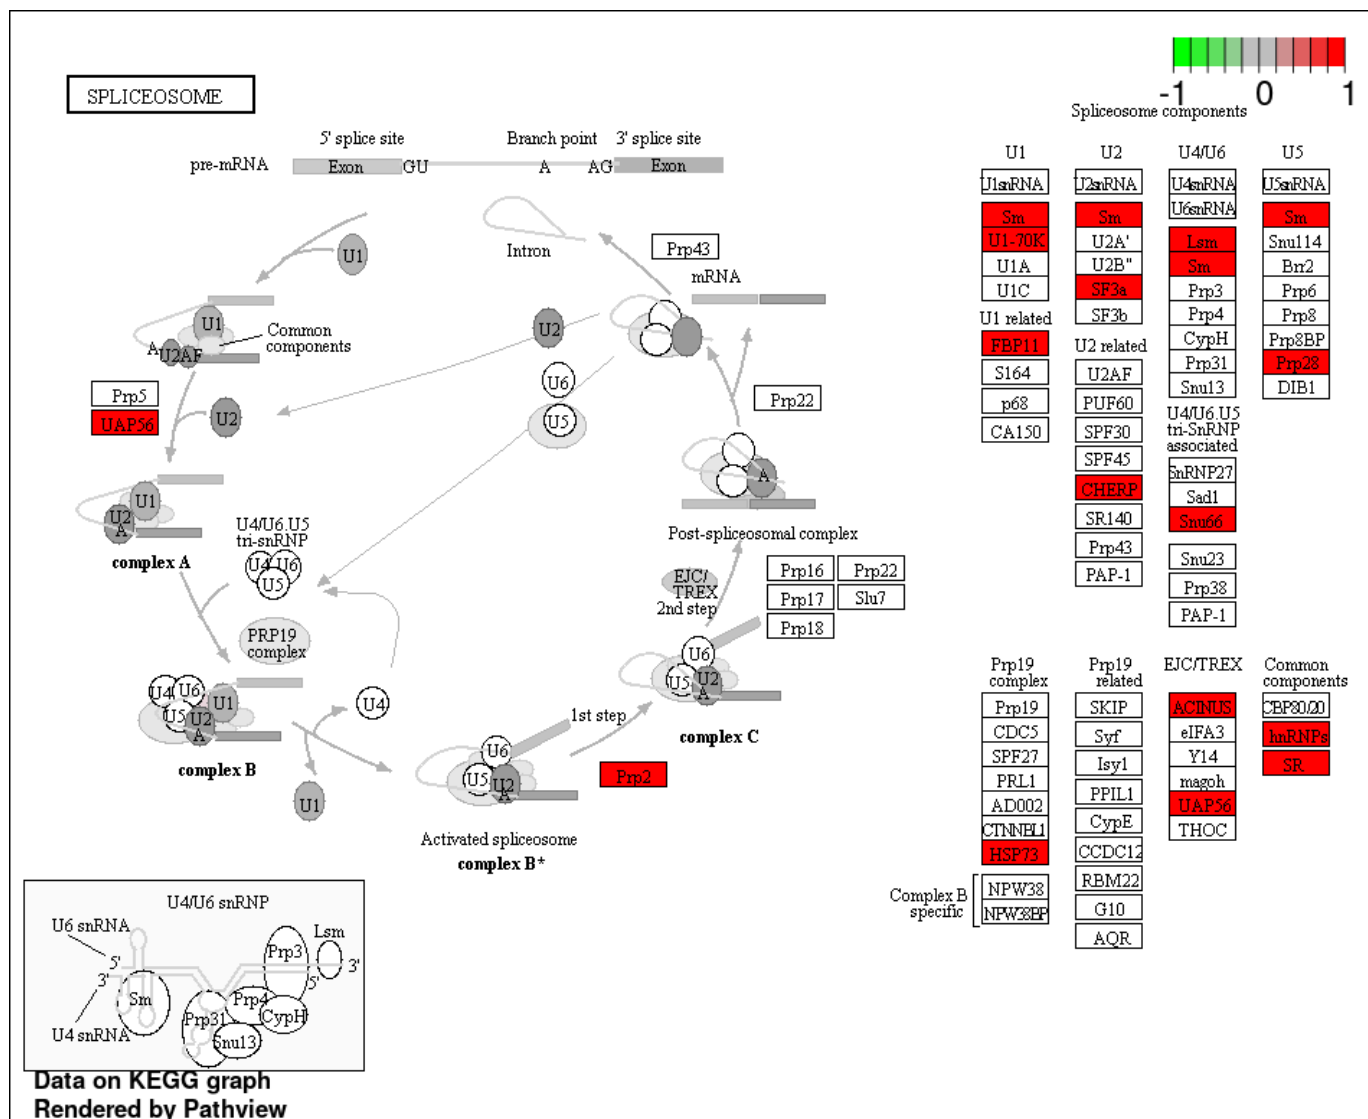

Supplement: Supplementary file 1 [file 14929769]
